# Supplementary material for: Comparison of DNA Extraction and Amplification Techniques for Use with Engorged Hard-Bodied Ticks
Source: MDPI journal article supplement (doi:10.3390/microorganisms10061254), 2022-06-20

Gel A

- 1.CTAB-WB-1
- 2.CTAB-WB-2
- 3.CTAB-WB-3
- 4.CTAB-WB-4
- 5.CTAB-WB-5
- 6.CTAB-WB-6
- 7.CTAB-WB-7
- 8.CTAB-WB-8
- 9.CTAB-WB-9
- 10.CTAB-WB-10
- 11.CTAB-WB-11
- 12.Not used in analysis
- 13.CTAB-AC-12
- 14.CTAB-AC-13
- 15.CTAB-AC-14
- 16.CTAB-AC-15
- 17.CTAB-AC-16
- 18.CTAB-AC-17
- 19.CTAB-AC-18

All samples were  
amplified using AmpliTaq

500BP

400BP

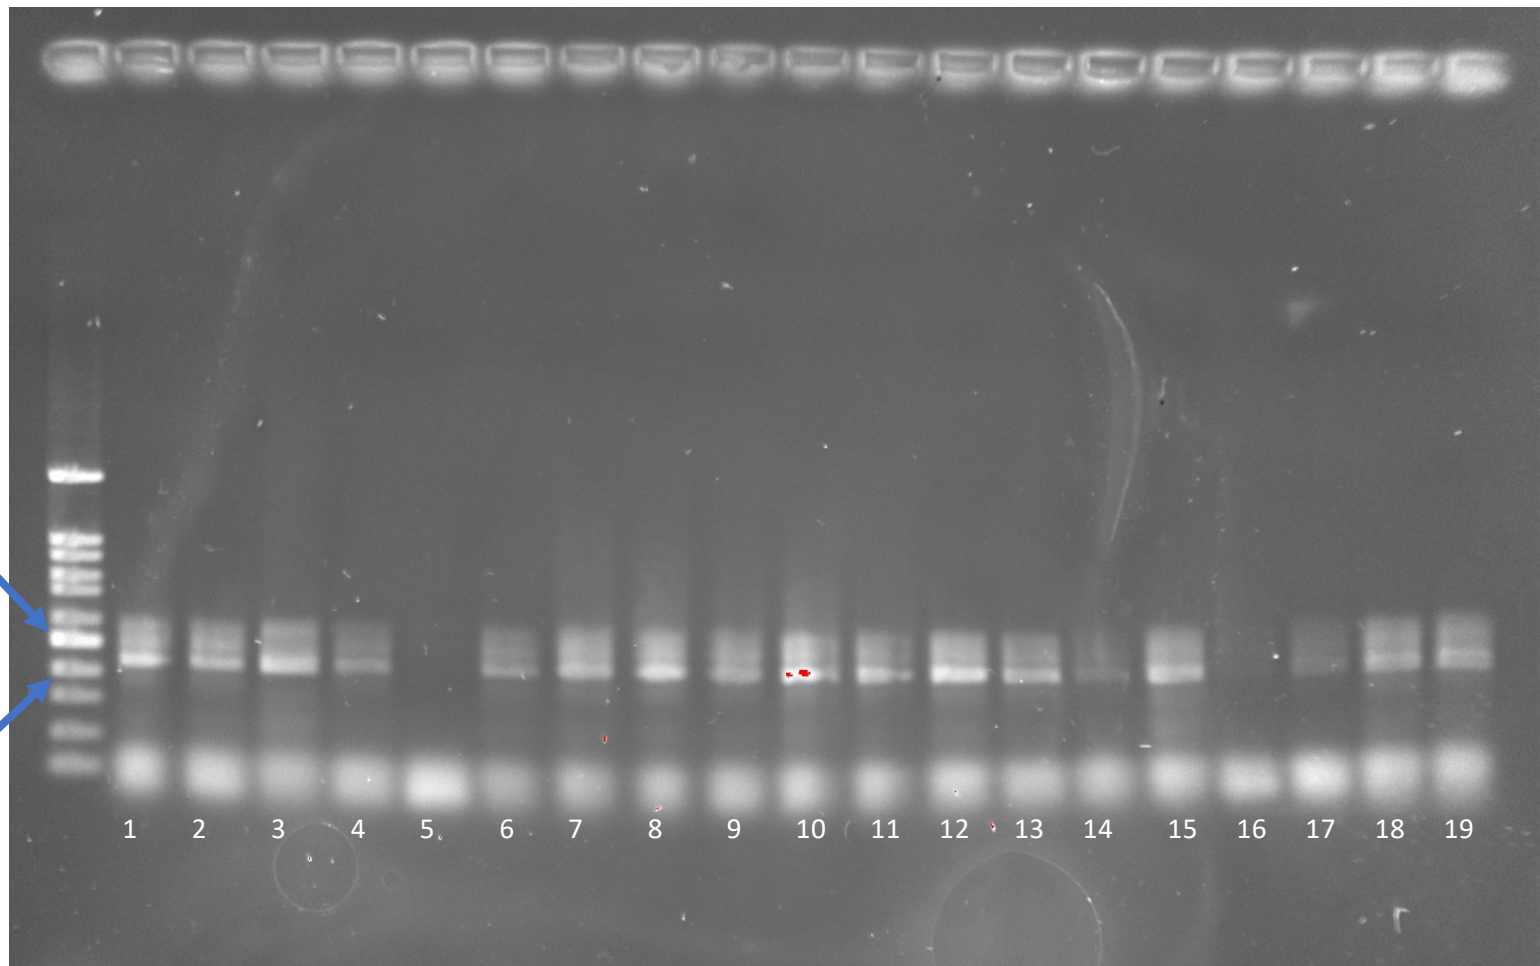

## Gel B

1. CTAB-AC-19
2. CTAB-AC-20
3. CTAB-AC-21
4. CTAB-AC-22
5. Not used in analysis
6. Not used in analysis
7. Not used in analysis
8. Not used in analysis
9. Not used in analysis
10. Not used in analysis
11. Not used in analysis
12. Not used in analysis
13. Not used in analysis
14. Not used in analysis
15. Not used in analysis
16. Not used in analysis
17. Not used in analysis
18. Not used in analysis
19. Not used in analysis

All samples were amplified  
using AmpliTaq

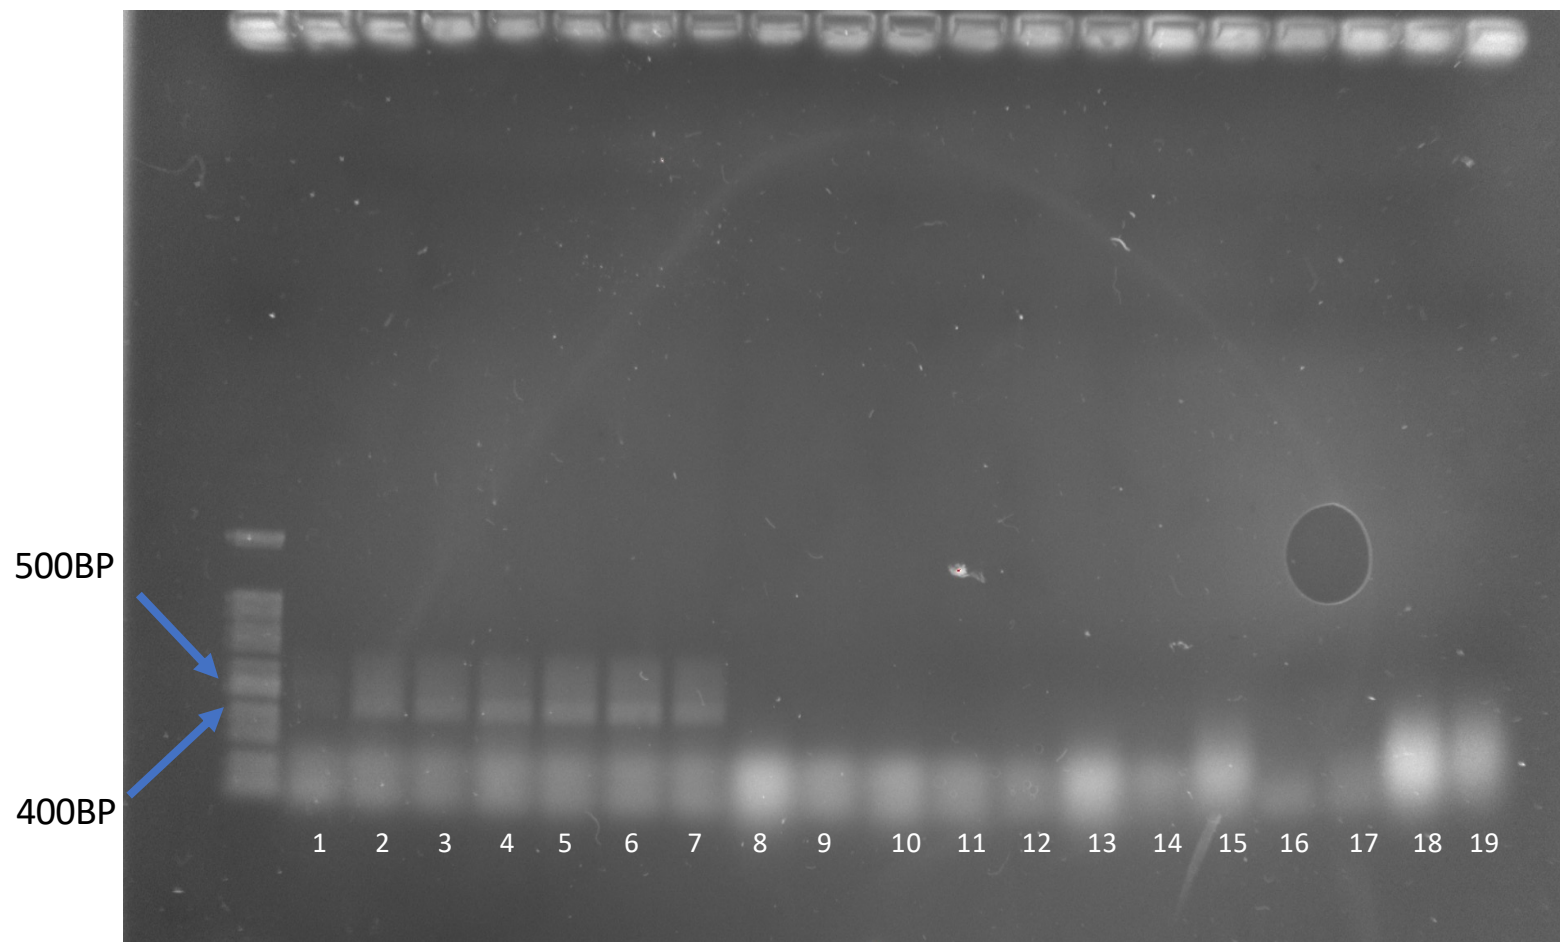

## Gel C

1. Ph-Cl-WB-1
2. Ph-Cl-WB-2
3. Ph-Cl-WB-3
4. Ph-Cl-WB-4
5. Ph-Cl-WB-5
6. Ph-Cl-WB-6
7. Ph-Cl-WB-7
8. Ph-Cl-WB-8
9. Ph-Cl-WB-9
10. Ph-Cl-WB-10
11. Ph-Cl-WB-11
12. Ph-Cl-AC-12
13. Ph-Cl-AC-13
14. Ph-Cl-AC-14
15. Ph-Cl-AC-15
16. Ph-Cl-AC-16
17. Ph-Cl-AC-17
18. Ph-Cl-AC-18
19. Ph-Cl-AC-19
20. Ph-Cl-AC-20
21. Ph-Cl-AC-21
22. Ph-Cl-AC-22
23. Not used in analysis
24. Not used in analysis
25. Positive Control
26. Negative Control

All samples were amplified using  
AmpliTaq

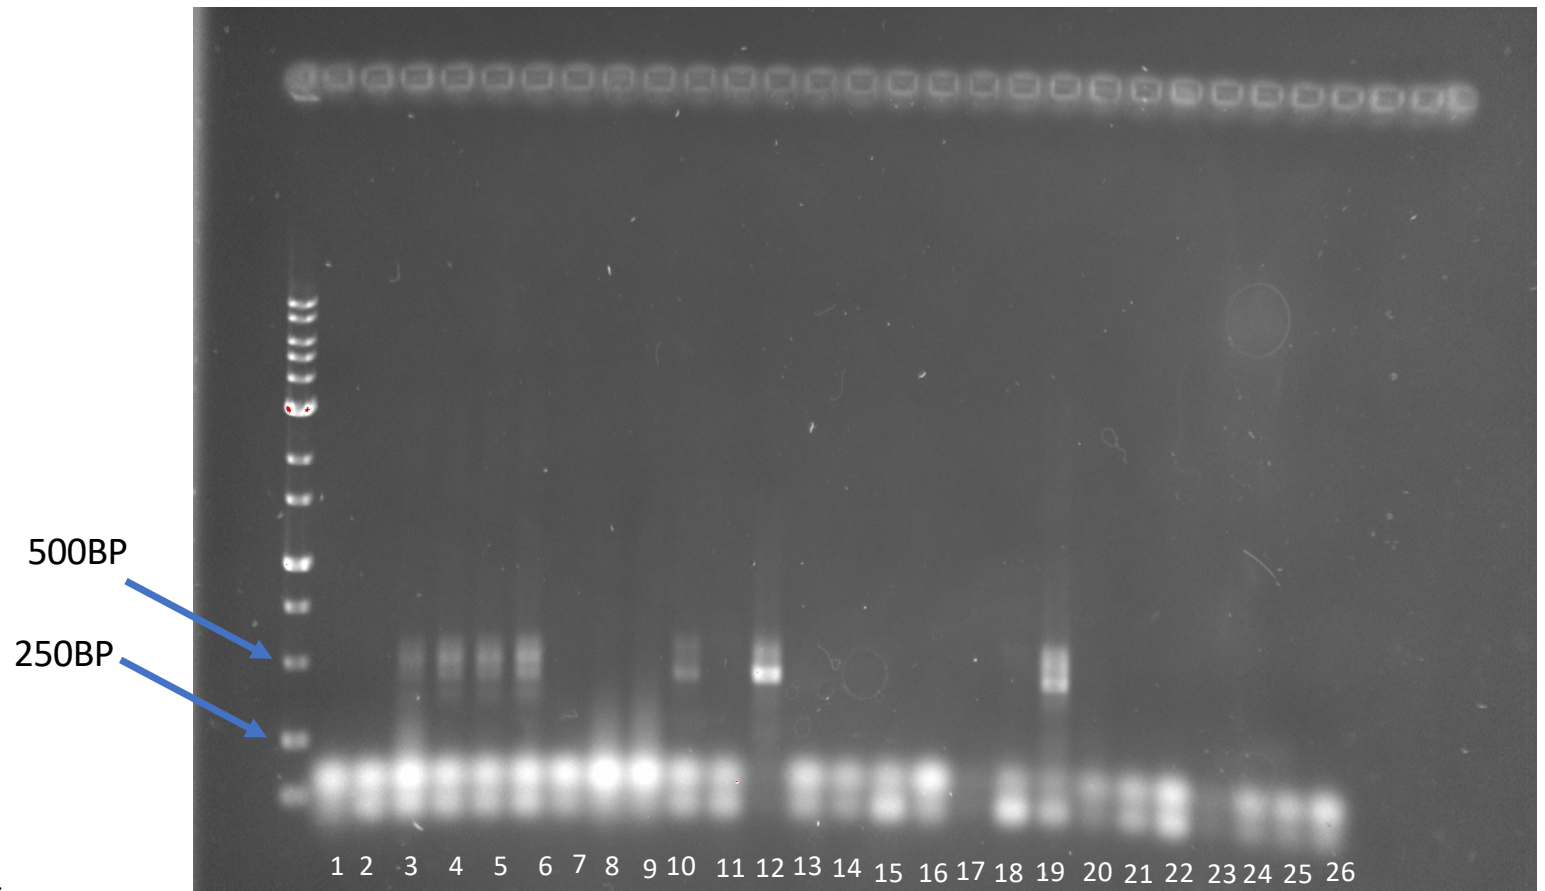

## Gel D

1. Qiagen-WB-1
2. Not used in analysis
3. Qiagen-WB-2
4. Qiagen-WB-3
5. Qiagen-WB-4
6. Qiagen-WB-5
7. Qiagen-WB-6
8. Qiagen-WB-7
9. Qiagen-WB-8
10. Qiagen-WB-9
11. Qiagen-WB-10
12. Qiagen-WB-11
13. Not used in analysis
14. Qiagen-AC-12
15. Qiagen-AC-13
16. Qiagen-AC-14
17. Qiagen-AC-15
18. Qiagen-AC-16
19. Qiagen-AC-17

All samples were amplified with AmpliTaq

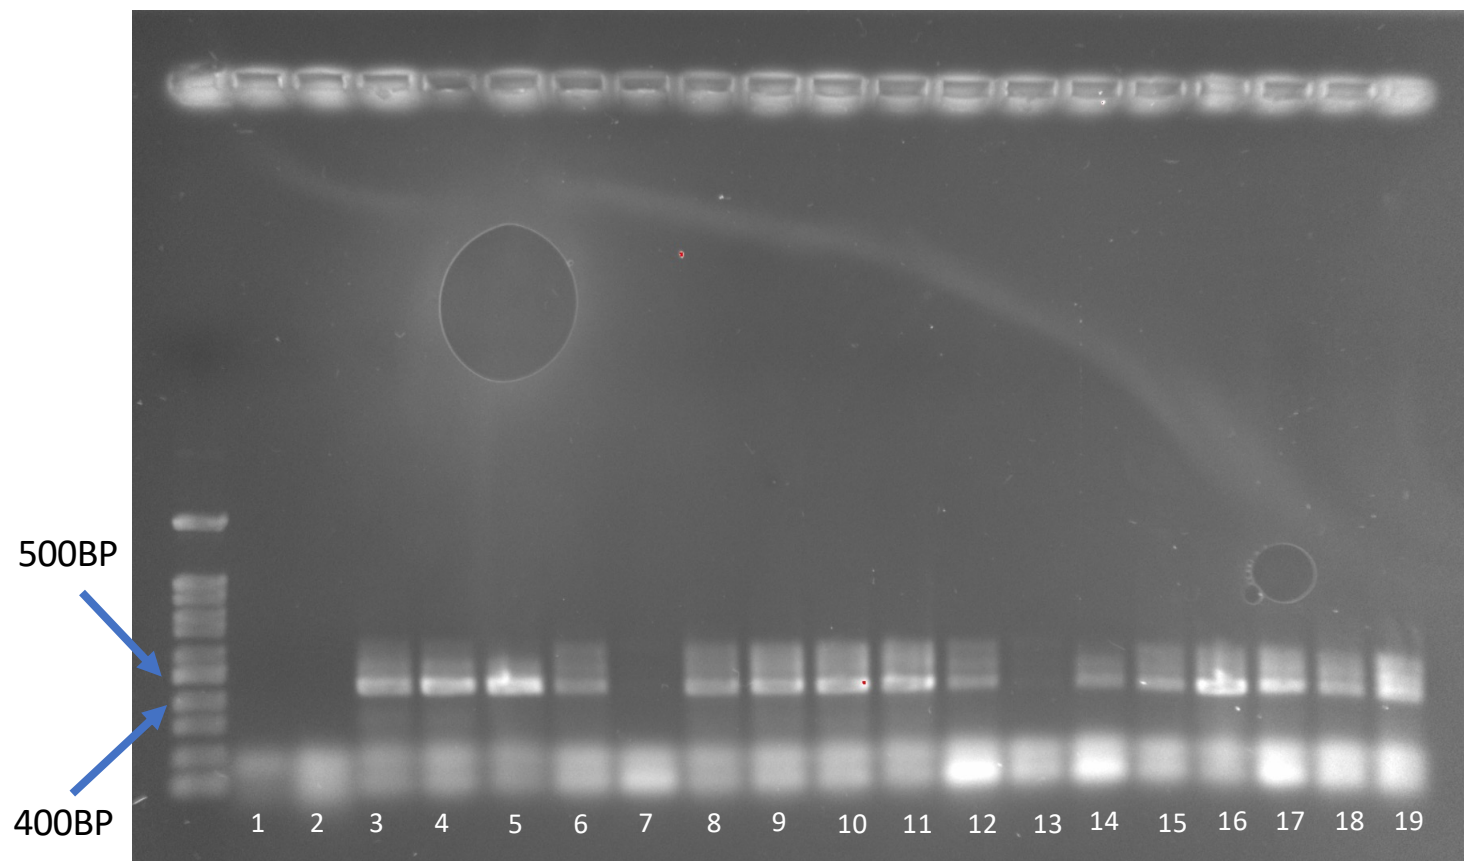



# Gel E

1. Qiagen-AC-18
2. Qiagen-AC-19
3. Qiagen-AC-20
4. Qiagen-AC-21
5. Qiagen-AC-22
6. Negative Control
7. Qiagen-AC-18
8. Qiagen-AC-19
9. Qiagen-AC-20
10. Qiagen-AC-21
11. Qiagen-AC-22
12. Negative Control

Samples 1-5 were amplified using GoTaq

Samples 7-11 were amplified using Ampligold

500BP

400BP

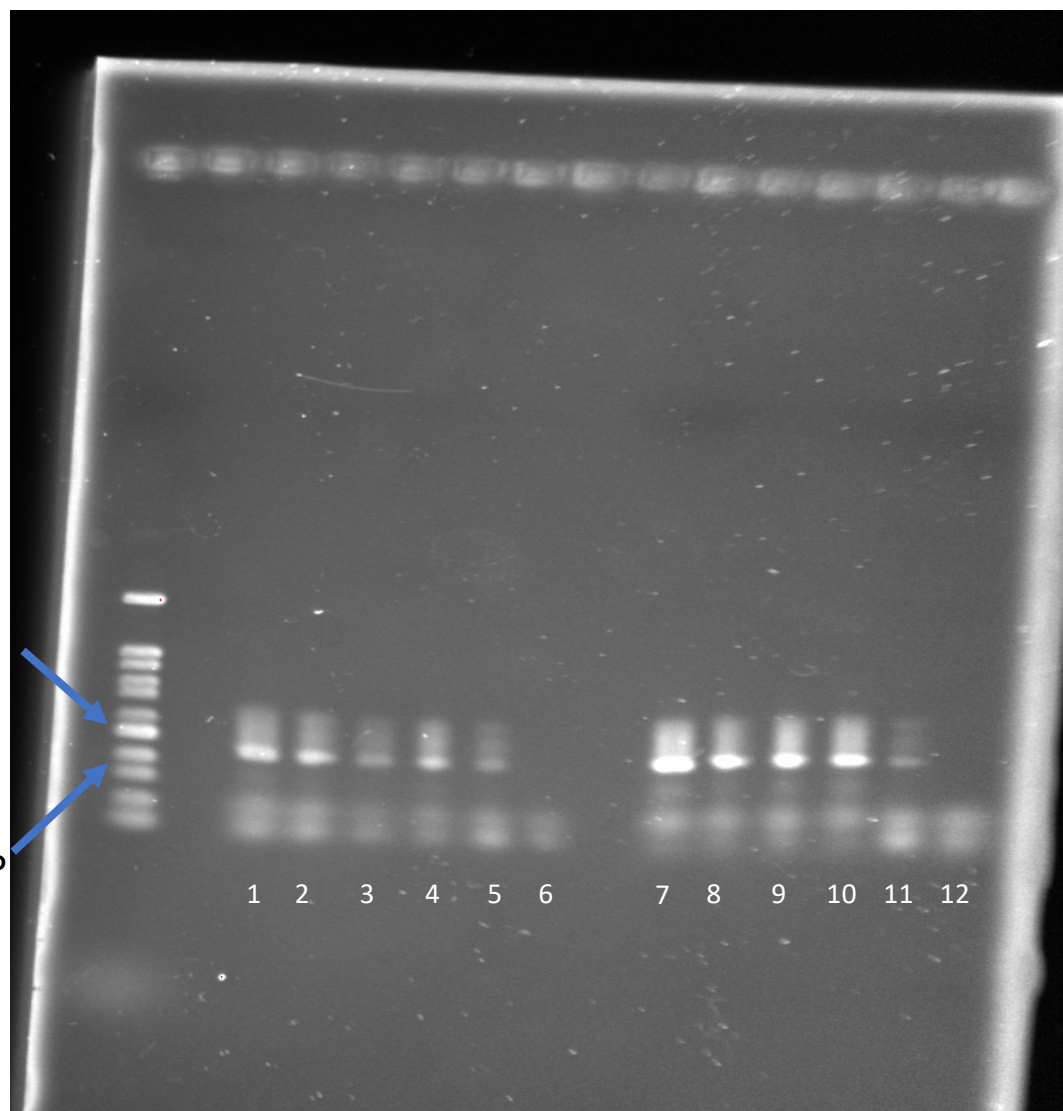

# Gel F

1. Qiagen-WB-1
2. Qiagen-WB-2
3. Qiagen-WB-3
4. Qiagen-WB-4
5. Qiagen-WB-5
6. Qiagen-WB-6
7. Qiagen-WB-7
8. Qiagen-WB-8
9. Qiagen-WB-9
10. Qiagen-WB-10
11. Qiagen-WB-11
12. Qiagen-AC-12
13. Qiagen-AC-13
14. Qiagen-AC-14
15. Qiagen-AC-15
16. Qiagen-AC-16
17. Qiagen-AC-17
18. Positive Control
19. Negative Control

All samples were amplified with GoTaq

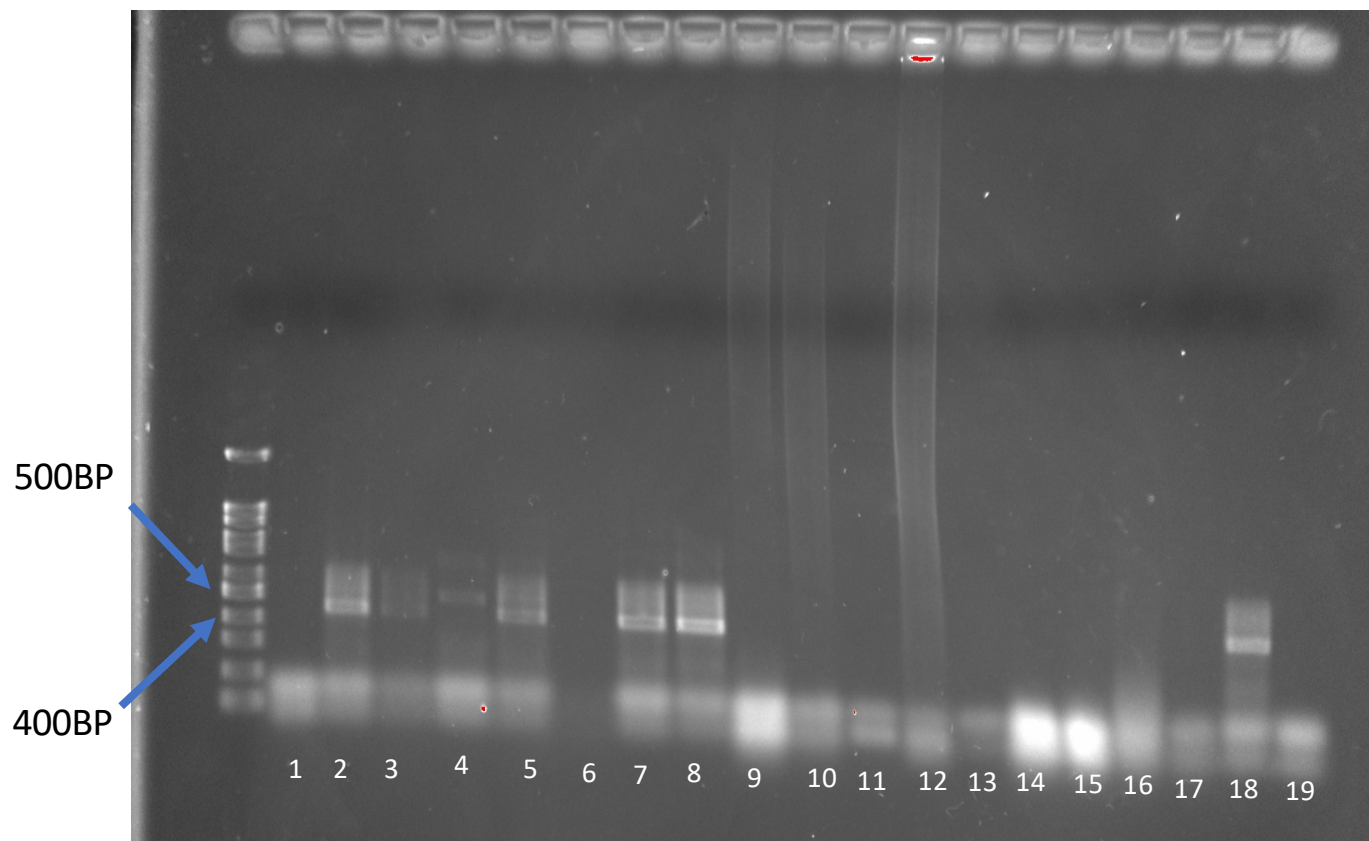

# Gel G

1. CTAB-WB-1
2. CTAB-WB-2
3. CTAB-WB-3
4. CTAB-WB-4
5. CTAB-WB-5
6. CTAB-WB-6
7. CTAB-WB-7
8. CTAB-WB-8
9. CTAB-WB-9
10. CTAB-WB-10
11. CTAB-WB-11
12. CTAB-AC-12
13. CTAB-AC-13
14. CTAB-AC-14
15. CTAB-AC-15
16. CTAB-AC-16
17. CTAB-AC-17
18. CTAB-AC-18
19. CTAB-AC-19

All samples were amplified  
using GoTaq

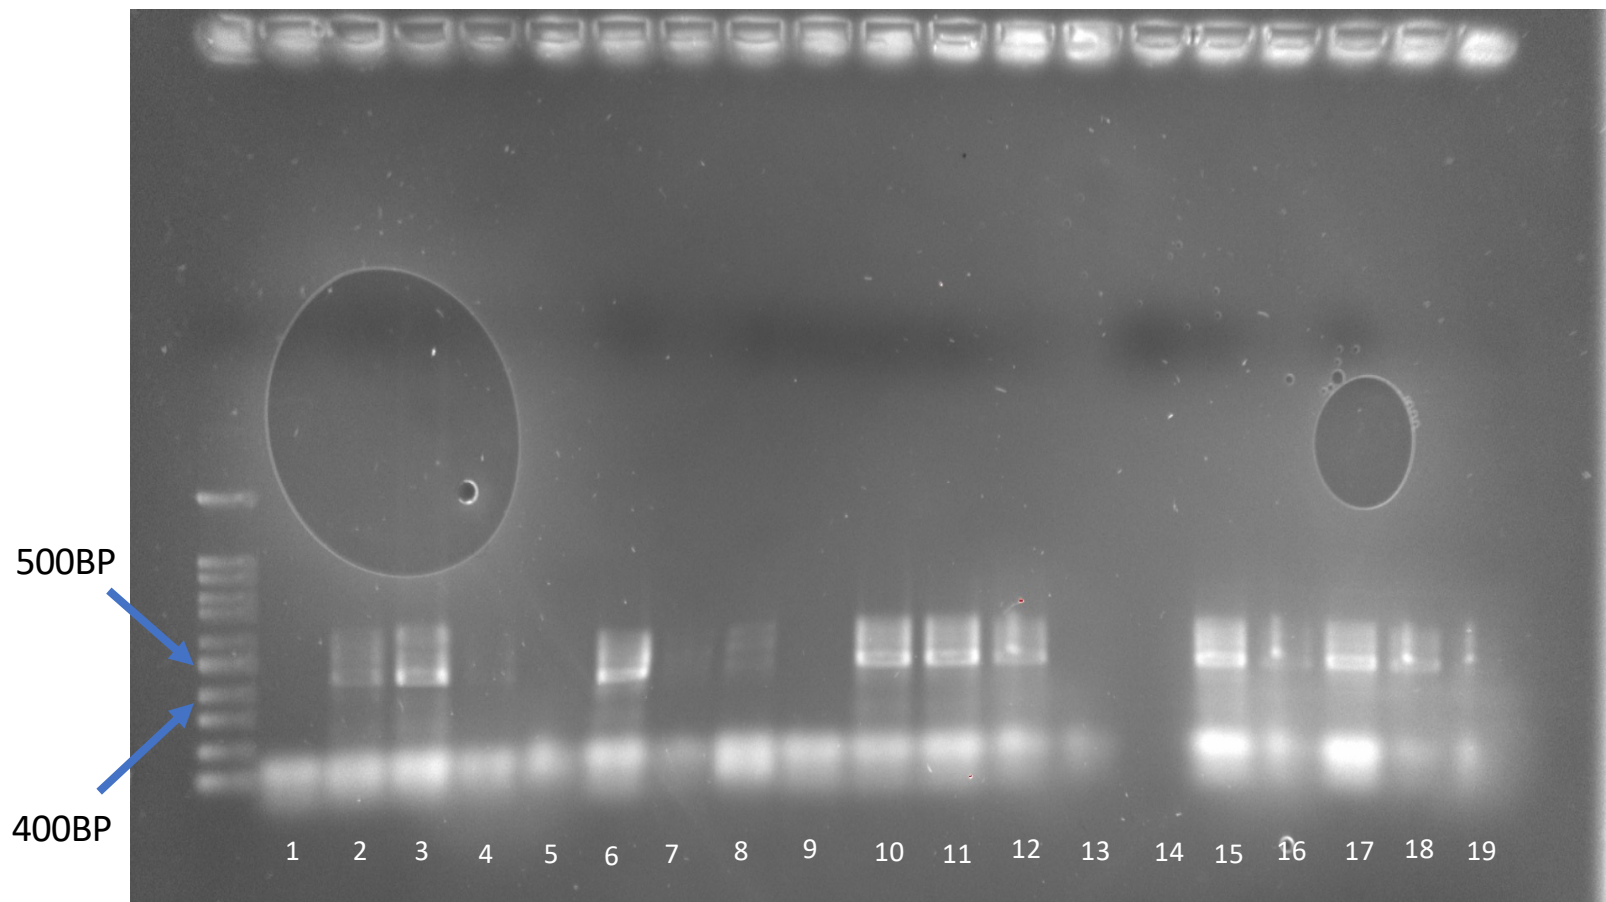

## Gel H

1. Ph-CI-WB-1
2. Ph-CI-WB-2
3. Ph-CI-WB-3
4. Ph-CI-WB-4
5. Ph-CI-WB-5
6. Ph-CI-WB-6
7. Ph-CI-WB-7
8. Ph-CI-WB-8
9. Ph-CI-WB-9
10. Ph-CI-WB-10
11. Ph-CI-WB-11
12. Ph-CI-AC-12
13. Ph-CI-AC-13
14. Ph-CI-AC-14
15. Ph-CI-AC-15
16. Ph-CI-AC-16
17. Ph-CI-AC-17
18. Ph-CI-AC-18
19. Ph-CI-AC-19
20. Ph-CI-AC-20
21. Ph-CI-AC-21
22. Ph-CI-AC-22
23. Not used in analysis
24. Not used in analysis
25. Positive Control
26. Negative Control

All samples were amplified using  
GoTaq

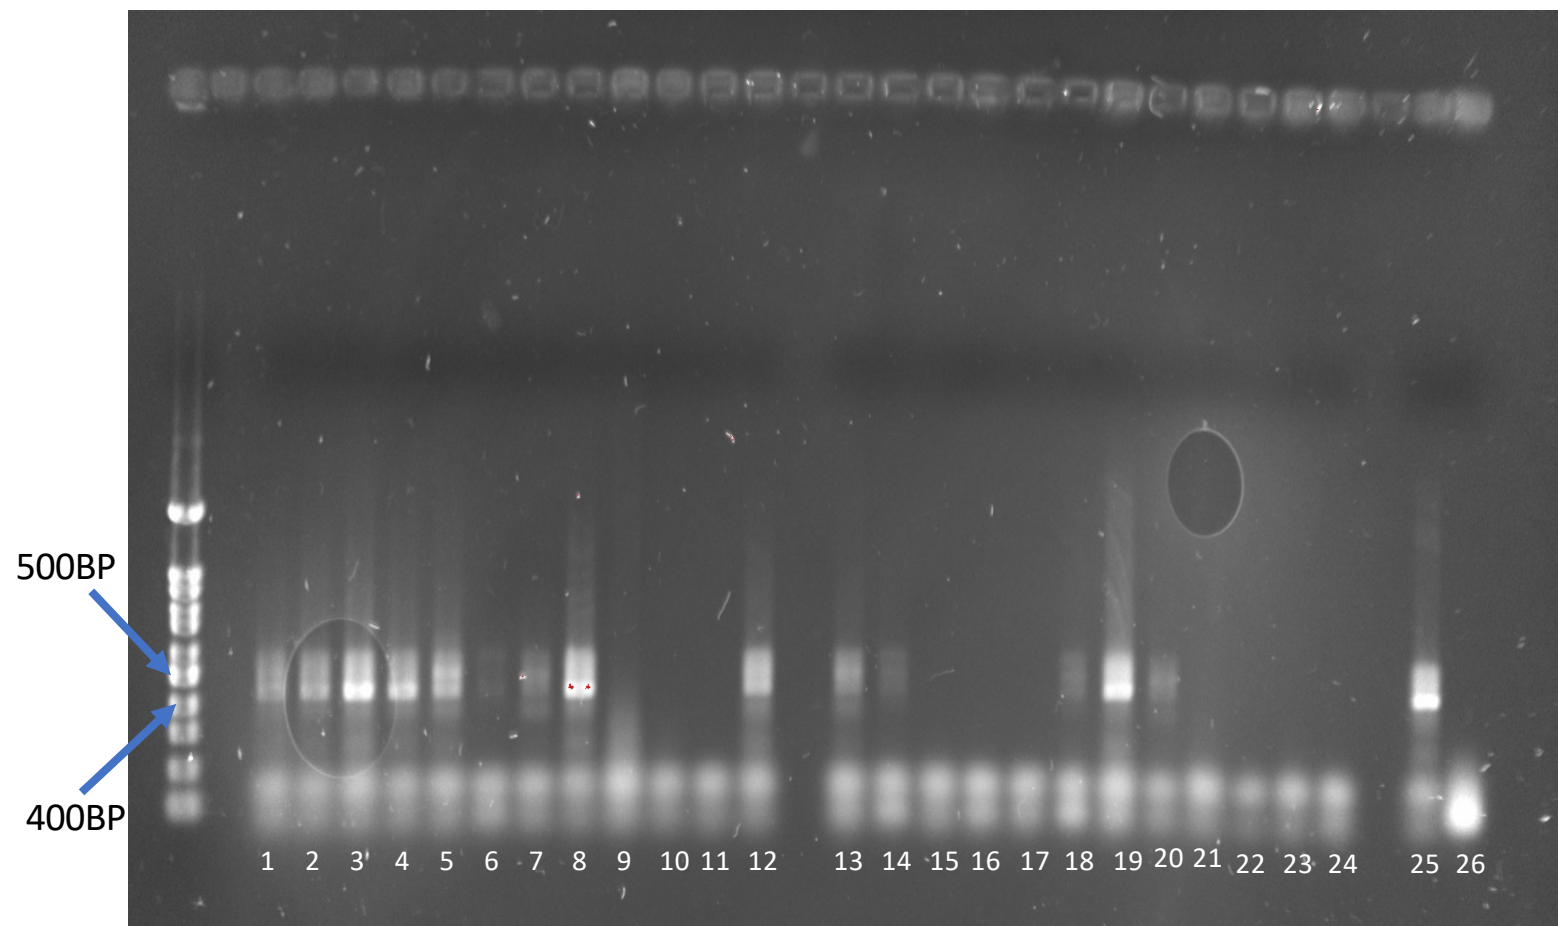



## Gel I

1. Ph-CI-WB-1
2. Ph-CI-WB-2
3. Ph-CI-WB-3
4. Ph-CI-WB-4
5. Ph-CI-WB-5
6. Ph-CI-WB-6
7. Ph-CI-WB-7
8. Ph-CI-WB-8
9. Ph-CI-WB-9
10. Ph-CI-WB-10
11. Ph-CI-WB-11
12. Ph-CI-AC-12
13. Ph-CI-AC-13
14. Ph-CI-AC-14
15. Ph-CI-AC-15
16. Ph-CI-AC-16
17. Ph-CI-AC-17
18. Ph-CI-AC-18
19. Ph-CI-AC-19
20. Ph-CI-AC-20
21. Ph-CI-AC-21
22. Ph-CI-AC-22

23. Not used in analysis
24. Not used in analysis
25. Positive Control
26. Negative Control

All samples were amplified using Phusion Taq

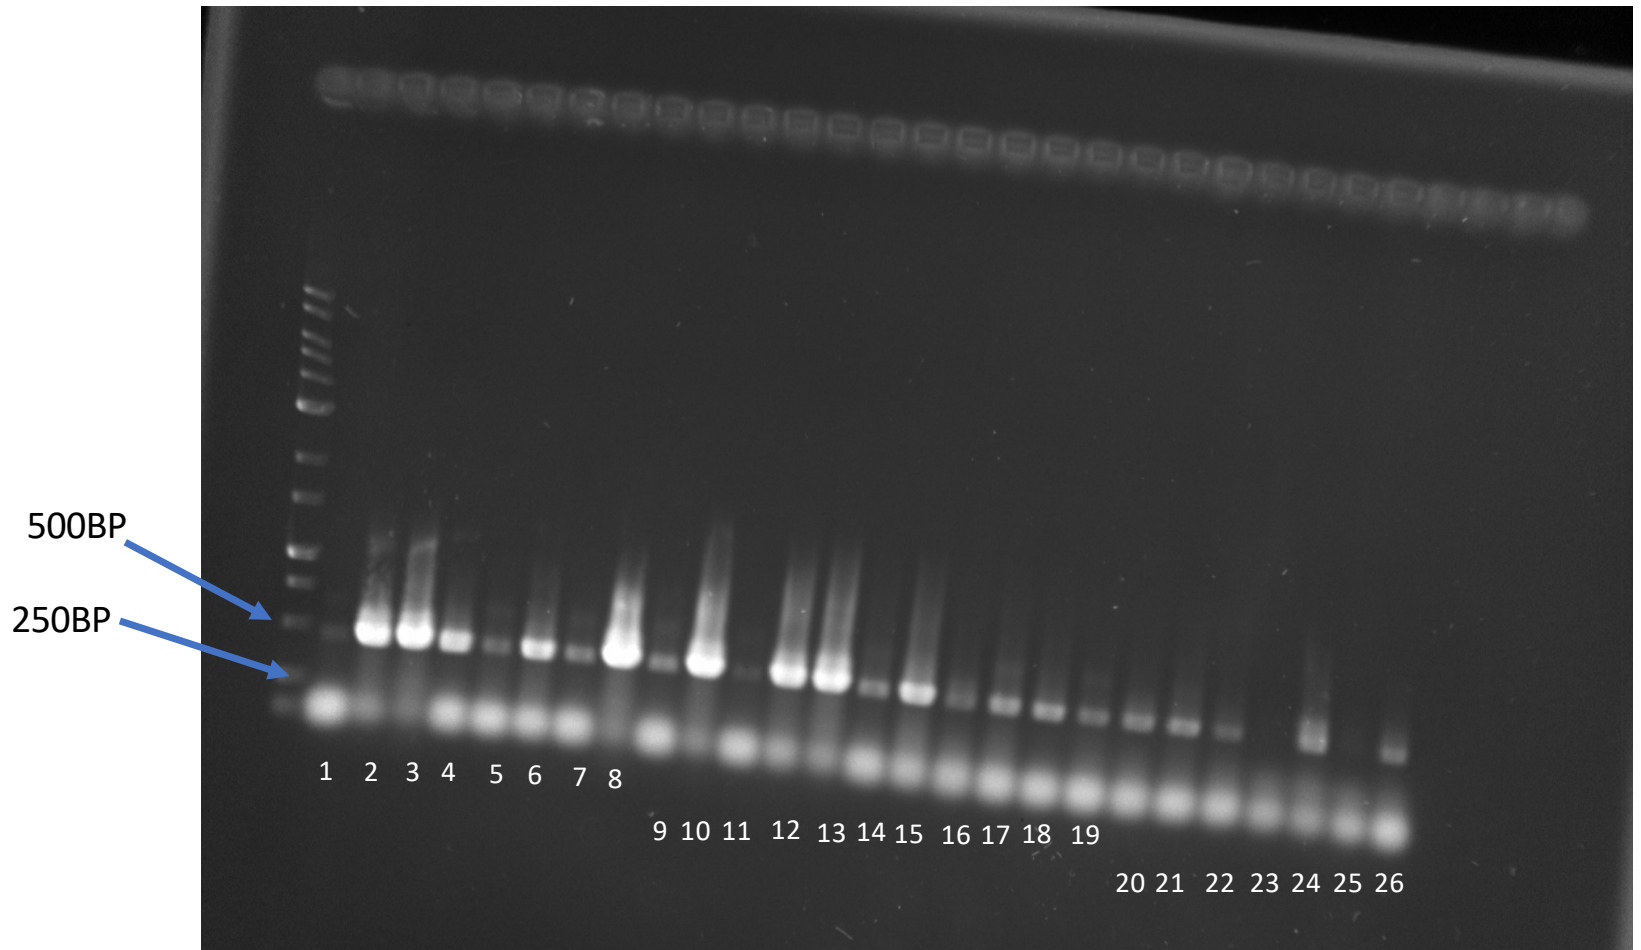

## Gel J

1. Qiagen-WB-1
2. Qiagen-WB-2
3. Qiagen-WB-3
4. Qiagen-WB-4
5. Qiagen-WB-5
6. Qiagen-WB-6
7. Qiagen-WB-7
8. Qiagen-WB-8
9. Qiagen-WB-9
10. Qiagen-WB-10
11. Qiagen-WB-11
12. Qiagen-AC-12
13. Qiagen-AC-13
14. Qiagen-AC-14
15. Qiagen-AC-15
16. Qiagen-AC-16
17. Qiagen-AC-17
18. Qiagen-AC-18
19. Qiagen-AC-19

All samples were amplified  
with Phusion Taq

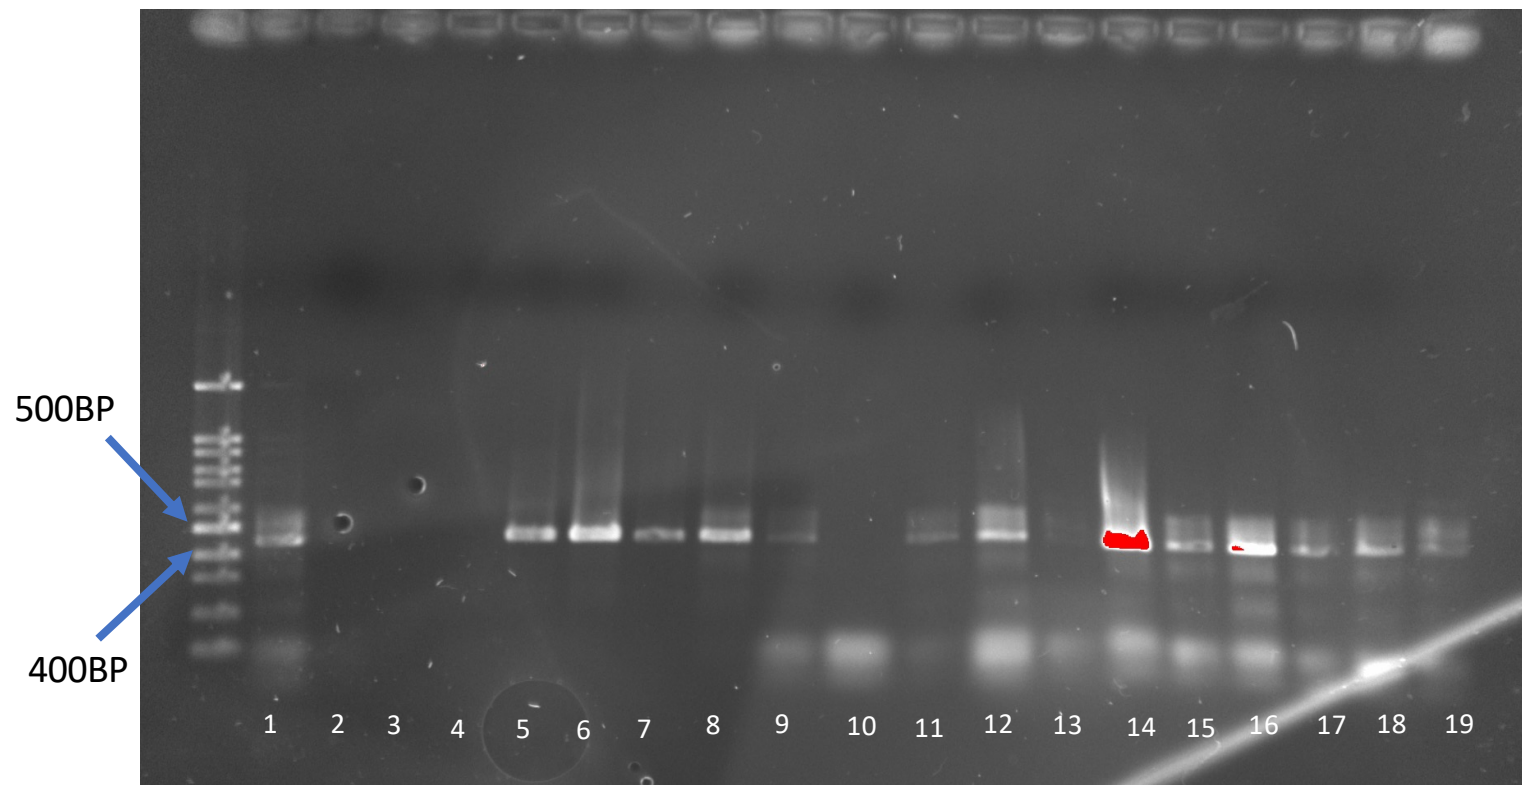

## Gel K

1. CTAB-WB-1
2. CTAB-WB-2
3. CTAB-WB-3
4. CTAB-WB-4
5. CTAB-WB-5
6. CTAB-WB-6
7. CTAB-WB-7
8. CTAB-WB-8
9. CTAB-WB-9
10. CTAB-WB-10
11. CTAB-WB-11
12. CTAB-AC-12
13. CTAB-AC-13
14. CTAB-AC-14
15. CTAB-AC-15
16. CTAB-AC-16
17. CTAB-AC-17
18. CTAB-AC-18
19. CTAB-AC-19
20. CTAB-AC-20
21. CTAB-AC-21
22. CTAB-AC-22

23. Negative Control

All samples were amplified using Phusion  
Taq

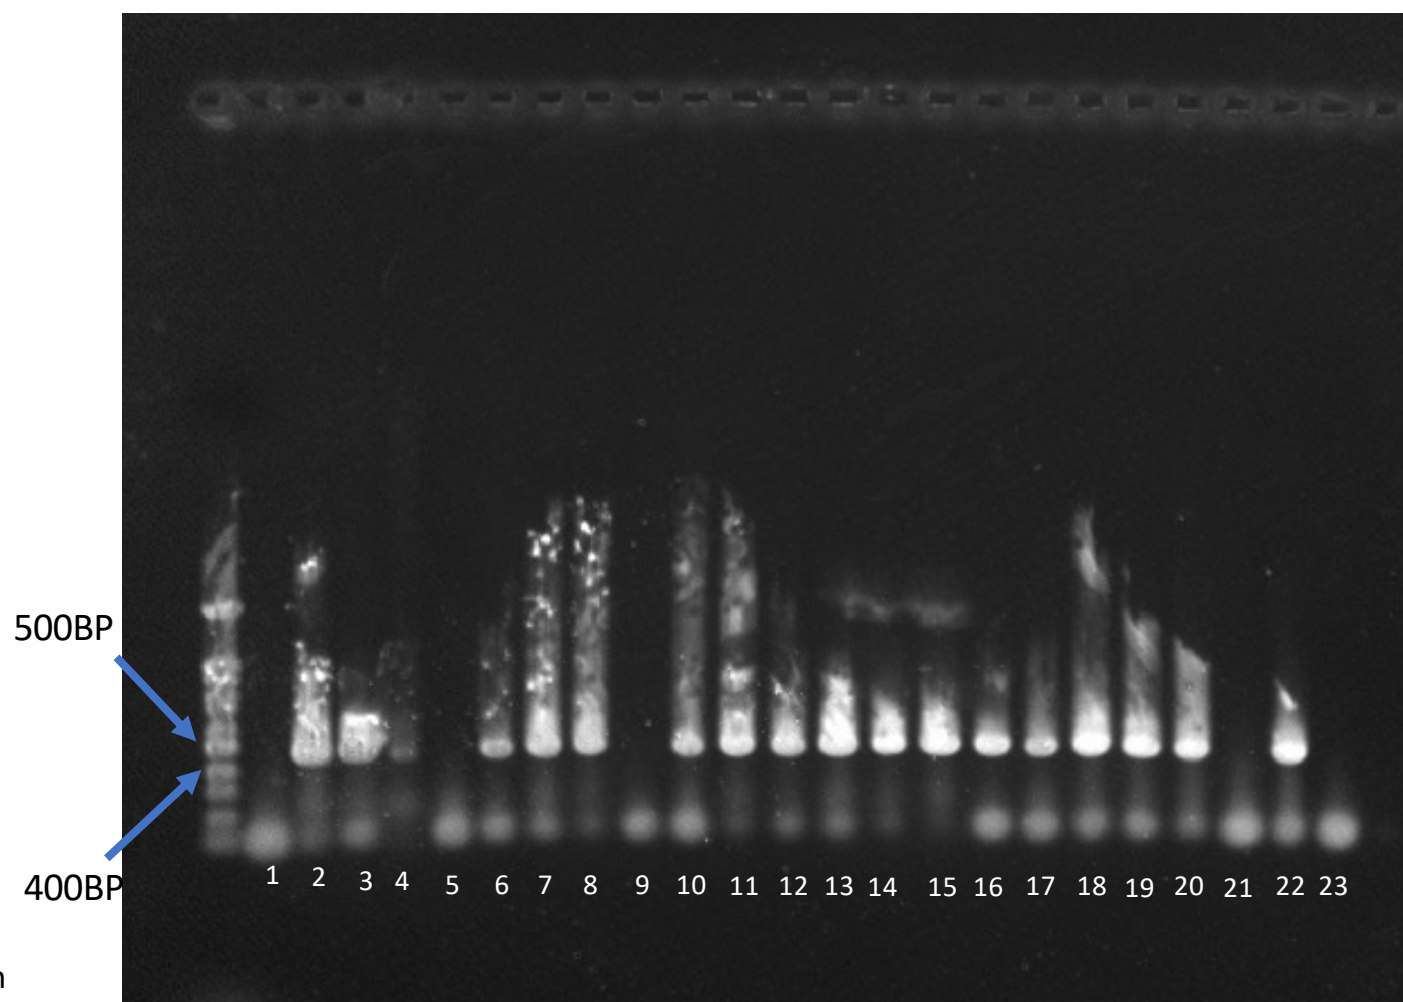

## Gel L

1. Ph-Cl-WB-1
2. Ph-Cl-WB-2
3. Ph-Cl-WB-3
4. Ph-Cl-WB-4
5. Ph-Cl-WB-5
6. Ph-Cl-WB-6
7. Ph-Cl-WB-7
8. Ph-Cl-WB-8
9. Ph-Cl-WB-9
10. Ph-Cl-WB-10
11. Ph-Cl-WB-11
12. Ph-Cl-AC-12
13. Ph-Cl-AC-13
14. Ph-Cl-AC-14
15. Ph-Cl-AC-15
16. Ph-Cl-AC-16
17. Ph-Cl-AC-17
18. Ph-Cl-AC-18
19. Ph-Cl-AC-19
20. Ph-Cl-AC-20
21. Ph-Cl-AC-21
22. Ph-Cl-AC-22
23. Not used in analysis
24. Not used in analysis
25. Positive Control
26. Negative Control

All samples were amplified using HemoKlen  
Taq

500BP  
250BP

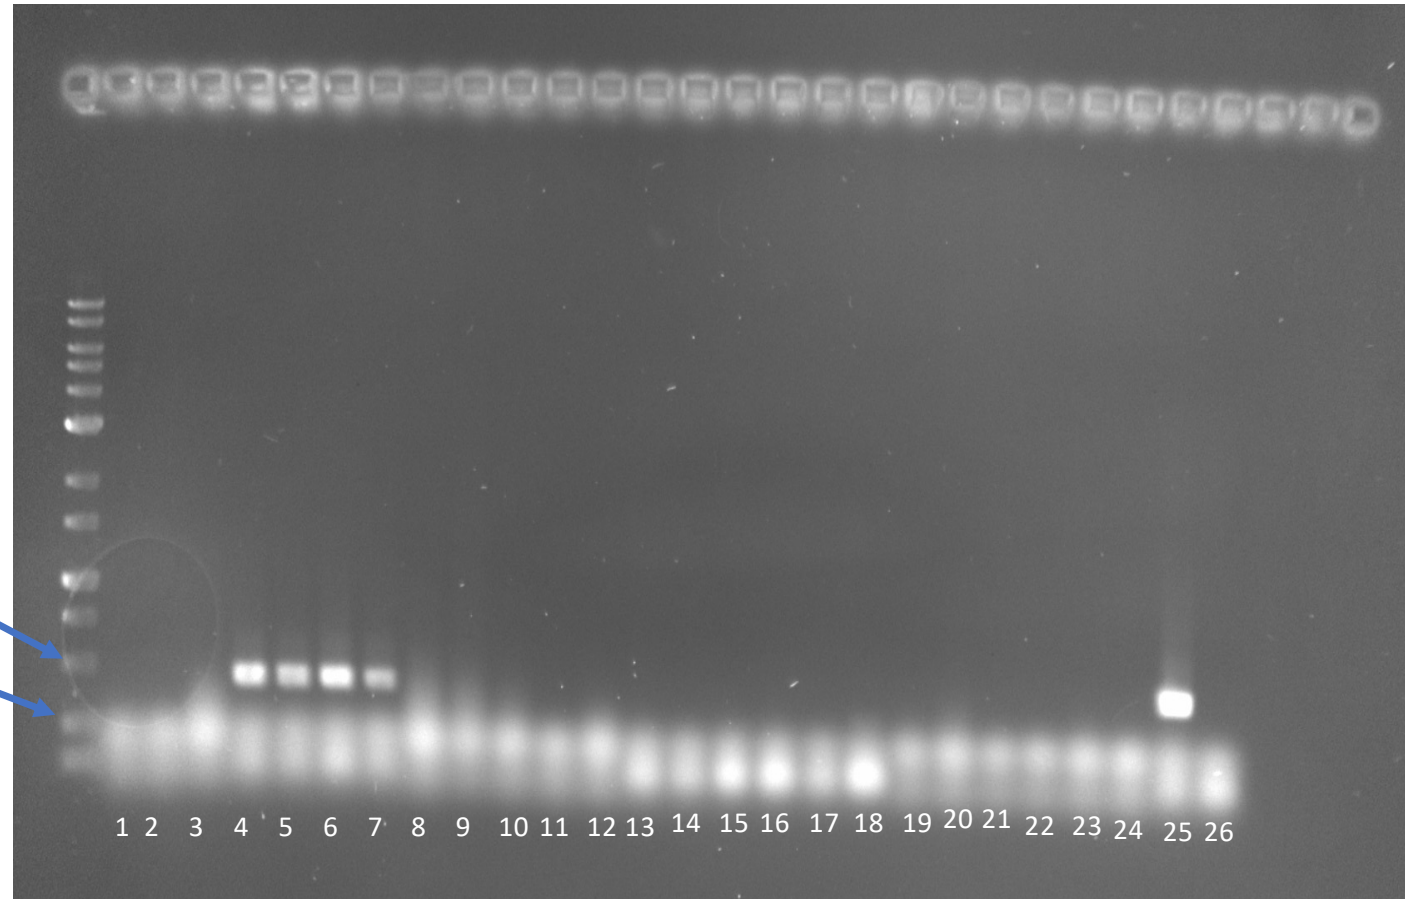



## Gel M

1. Qiagen-WB-1
2. Qiagen-WB-2
3. Qiagen-WB-3
4. Qiagen-WB-4
5. Qiagen-WB-5
6. Qiagen-WB-6
7. Qiagen-WB-7
8. Qiagen-WB-8
9. Qiagen-WB-9
10. Qiagen-WB-10
11. Qiagen-WB-11
12. Qiagen-AC-12
13. Qiagen-AC-13
14. Qiagen-AC-14
15. Qiagen-AC-15
16. Qiagen-AC-16
17. Qiagen-AC-17
18. Qiagen-AC-18
19. Qiagen-AC-19
20. Qiagen-AC-20
21. Qiagen-AC-21
22. Qiagen-AC-22
23. Not used in analysis
24. Not used in analysis
25. Negative Control
26. Positive Control

All samples were amplified using HemoKlen

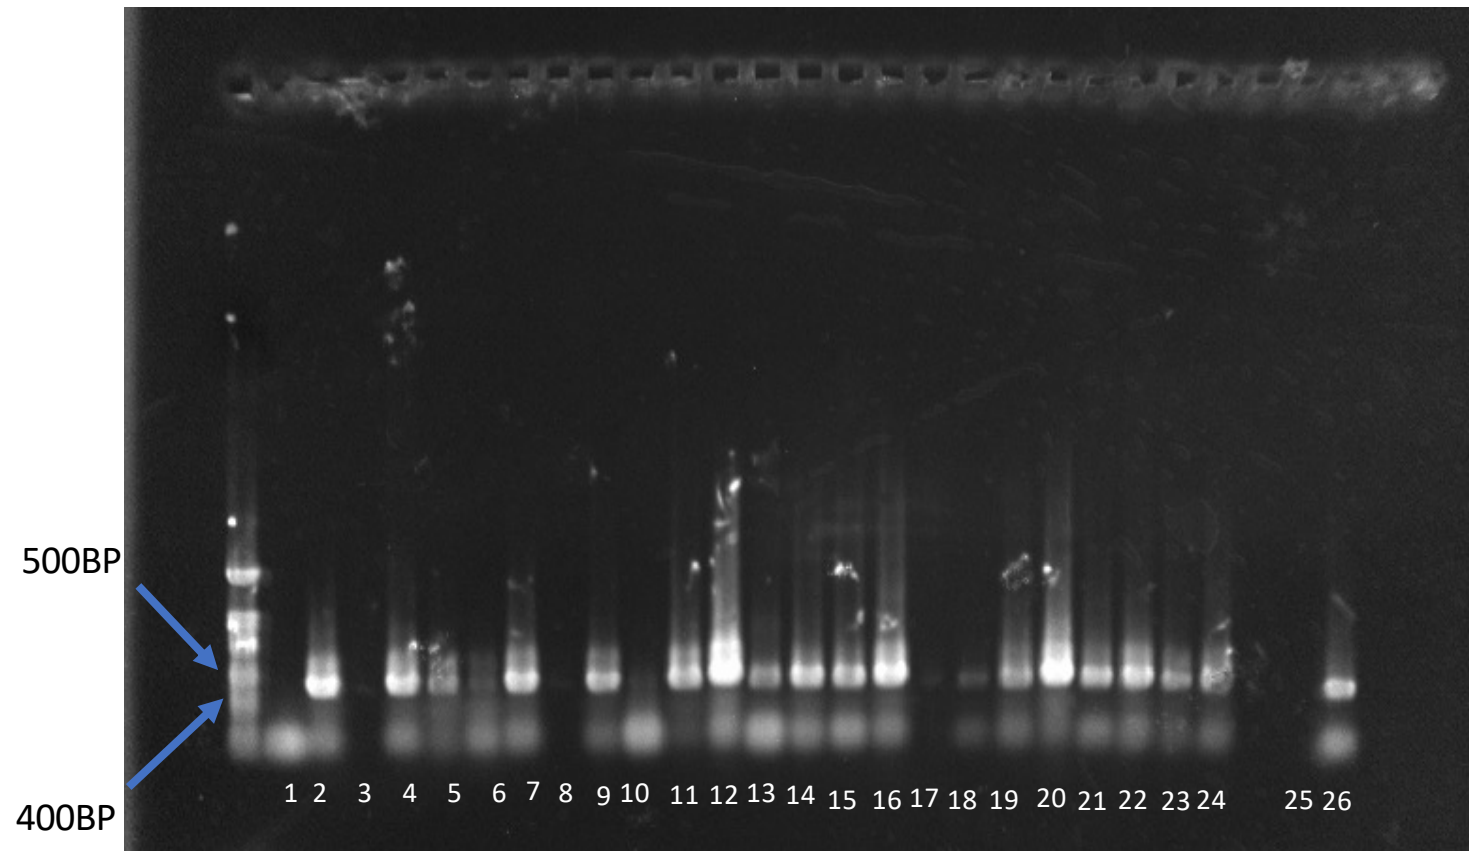

## Gel N

1. Qiagen-WB-20

2. Qiagen-WB-21

3. Qiagen-WB-22

4. Not used in analysis

5. Not used in analysis

6. Not used in analysis

7. Not used in analysis

8. Not used in analysis

9. Not used in analysis

10. Not used in analysis

11. Not used in analysis

12. Not used in analysis

13. Positive Control

All samples were amplified using

Phusion Taq

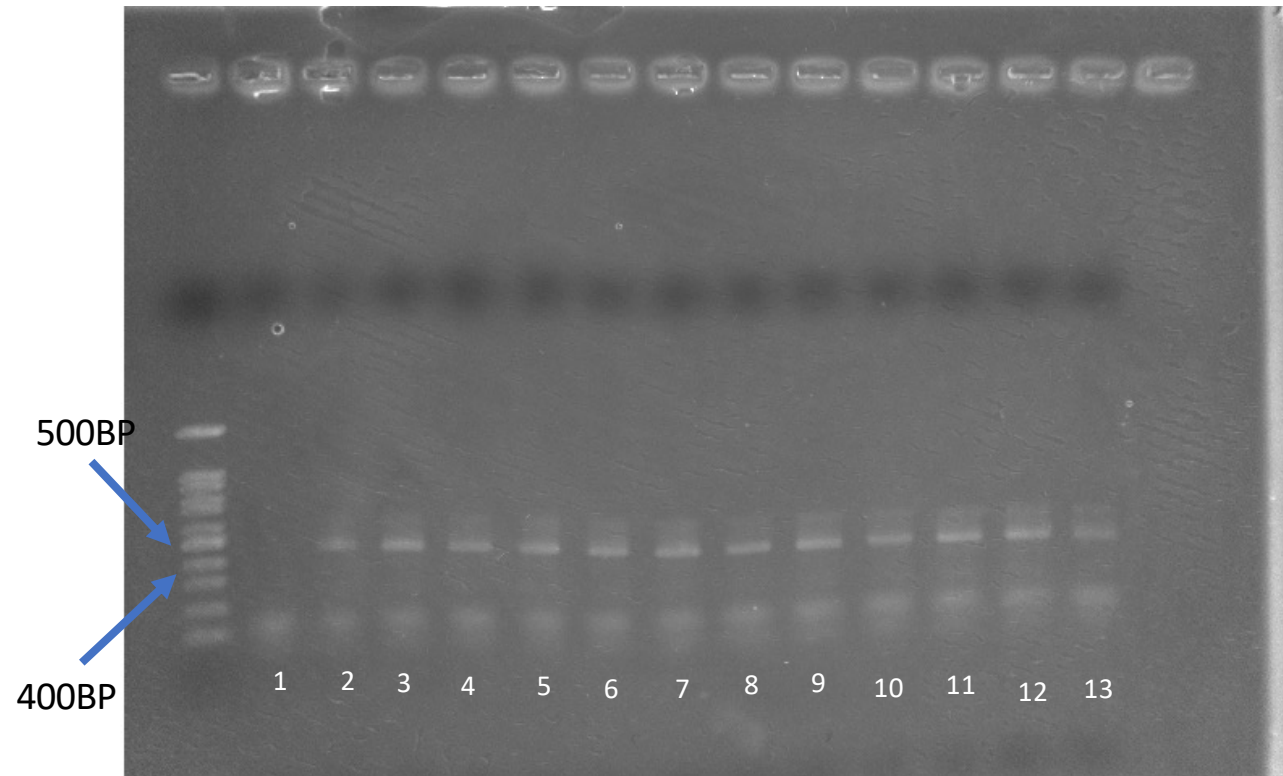

## Gel O

1. CTAB-WB-1
2. CTAB-WB-2
3. CTAB-WB-3
4. CTAB-WB-4
5. CTAB-WB-5
6. CTAB-WB-6
7. CTAB-WB-7
8. CTAB-WB-8
9. CTAB-WB-9
10. CTAB-WB-10
11. CTAB-WB-11
12. CTAB-AC-12
13. CTAB-AC-13
14. CTAB-AC-14
15. CTAB-AC-15
16. CTAB-AC-16
17. CTAB-AC-17
18. CTAB-AC-18
19. CTAB-AC-19
20. CTAB-AC-20
21. CTAB-AC-21
22. CTAB-AC-22
23. Positive Control

All samples were amplified using Hemoklen  
Taq

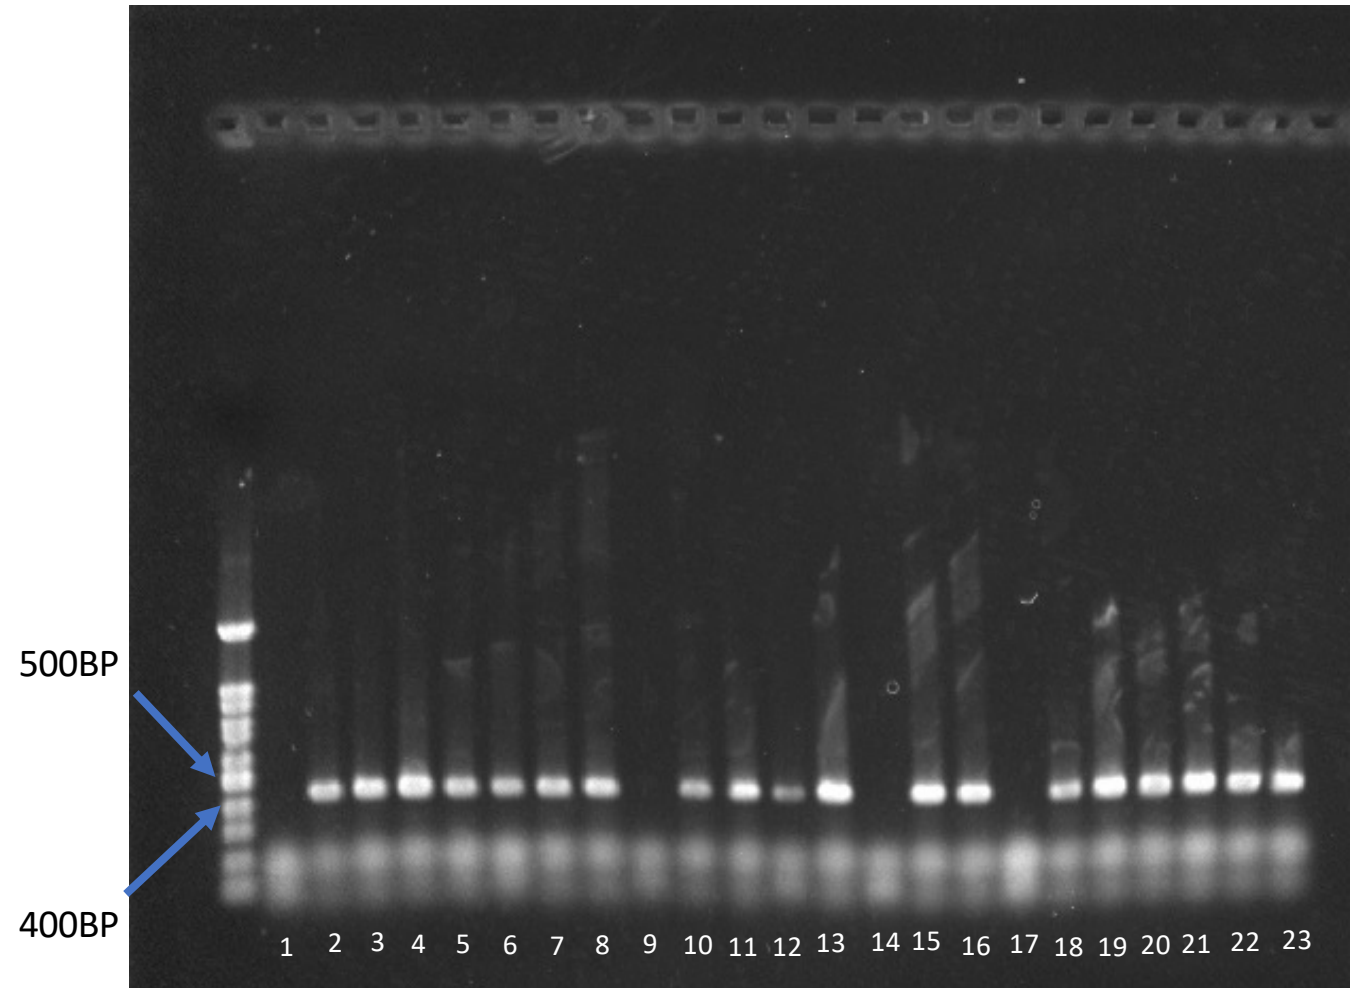

Supplement: s1 [file s1]
