# Supplementary material for: Comparison of DNA Extraction and Amplification Techniques for Use with Engorged Hard-Bodied Ticks
Source: Microorganisms. 2022 Jun 20;10(6):1254. doi: 10.3390/microorganisms10061254 (PMC9228219; doi:10.3390/microorganisms10061254)
Supplement: Supplementary file 1 [file microorganisms-10-01254-s001.zip › Supplemental Table S1_DNA Extraction.xlsx]

## Sheet: Sheet1
	BDT	Sample #	Avg Weight	DNA Concentration	260/280
	CTAB	D35 A	0.0287	652.2	1.88
	CTAB	284 A (D)	0.031433	48.9	2.29
	CTAB	D35 G	0.030767	191.3	2.04
	CTAB	284 S	0.278167	63.9	1.78
	CTAB	284 K1	0.2857	13.6	1.89
	CTAB	284 E	0.1006	202.2	1.72
	CTAB	284 F	0.067967	279.7	1.8
	CTAB	284 K	0.064567	253.1	1.75
	CTAB	D35 C	0.0388	746.1	1.9
	CTAB	D35 D	0.0186	202.8	1.96
	CTAB	602 N	0.0461	294.9	1.76
	Insides	Sample #	Avg Weight	DNA Concentration	260/280
	CTAB	602 F1	0.052267	381.3	1.91
	CTAB	602 H	0.066533	80.7	1.78
	CTAB	602 I	0.034767	282.1	1.91
	CTAB	602 J	0.015667	23.6	1.87
	CTAB	602 K	0.013967	35.3	1.94
	CTAB	602 L	0.0176	37.6	1.88
	CTAB	602 G1	0.0596	23.7	1.68
	CTAB	602 J1	0.066	37.7	1.83
	CTAB	178 A	0.066733	146.3	1.86
	CTAB	178 B	0.055667	47.3	1.93
	CTAB	178 J	0.056633	87.5	1.89
	BDT	Sample #	Avg Weight	DNA Concentration	260/280
	PH-CL	178 H1	0.024	2830	1.88
	PH-CL	602 G1	0.046	2536.6	1.89
	PH-CL	602 E	0.078	3442.1	1.91
	PH-CL	641 C	0.013	3254.9	2.1
	PH-CL	602 K1	0.102	2105.9	1.92
	PH-CL	284 A	0.16	1558.6	1.83
	PH-CL	602 H1	0.078	1603.2	1.89
	PH-CL	284 X	0.101	3054.7	1.71
	PH-CL	Misc A	0.021	3518.5	2.06
	PH-CL	B1 C	0.022	5615.3	2.1
	PH-CL	178 E1	0.007	1985.1	2
	Insides	Sample #	Avg Weight	DNA Concentration	260/280
	PH-CL	602 C1	0.086	545.7	1.99
	PH-CL	602 U1	0.098	1851.5	1.97
	PH-CL	178 B	0.029	436.5	1.9
	PH-CL	602 Y1	0.07	2165.9	1.91
	PH-CL	602 C	0.183	1502.7	1.84
	PH-CL	602 D	0.383	2174.2	1.76
	PH-CL	602 Q1	0.342	2573.5	1.77
	PH-CL	602 B	0.43	2226.8	1.72
	PH-CL	602 P1	0.407	2668.6	1.72
	PH-CL	602 S1	0.344	1621.8	1.75
	PH-CL	602 T1	0.28	3430.8	1.88
	BDT	Sample #	Avg Weight	DNA Concentration	260/280
	Qiagen	602 B1	0.050267	89.9	2.05
	Qiagen	602 A2	0.015767	10.3	1.43
	Qiagen	178 E	0.0513	45.9	1.95
	Qiagen	284 P	0.174967	6.3	1.79
	Qiagen	284 R	0.1683	3.8	1.89
	Qiagen	178 D	0.177633	332.8	1.83
	Qiagen	665 O	0.0062	4.5	2.39
	Qiagen	665 P	0.014567	13.5	1.99
	Qiagen	665 Q	0.034467	4.4	2.6
	Qiagen	51 B	0.066767	480.3	2.2
	Qiagen	724 A	0.006167	8.6	2.65
	Insides	Sample #	Avg Weight	DNA Concentration	260/280
	Qiagen	178 F	0.057	7.5	1.41
	Qiagen	178 Z	0.104	-6	1.17
	Qiagen	665 L	0.012	28.3	2.19
	Qiagen	284 B	0.183	7.9	1.58
	Qiagen	665 J	0.147	11.6	2.14
	Qiagen	724 C	0.203	59.7	2.2
	Qiagen	MISC B	0.032	9.8	2.17
	Qiagen	MISC C	0.012	4.2	1.64
	Qiagen	MISC D	0.017	7.5	2.16
	Qiagen	MISC E	0.018	29.1	2.1
	Qiagen	MISC F	0.003	3.5	2.27

## Sheet: Sheet2
Supplemental table S1. DNA concentration and purity of all samples, organized by tick preparation method and DNA extraction method (PC = phenol-chloroform, Qiagen = Qiagen Dneasy Blood and Tissues kit, and CTAB = cetyltrimethylammonium bromide extraction)
Whole Body
	Extraction Method	Sample #	Avg Weight (g)	DNA Concentration (ng/µl)	260/280
	PC	178 H1	0.024	2830	1.88
	PC	602 G1	0.046	2536.6	1.89
	PC	602 E	0.078	3442.1	1.91
	PC	641 C	0.013	3254.9	2.1
	PC	602 K1	0.102	2105.9	1.92
	PC	284 A	0.16	1558.6	1.83
	PC	602 H1	0.078	1603.2	1.89
	PC	284 X	0.101	3054.7	1.71
	PC	Misc A	0.021	3518.5	2.06
	PC	B1 C	0.022	5615.3	2.1
	PC	178 E1	0.007	1985.1	2
	Qiagen	602 B1	0.050267	89.9	2.05
	Qiagen	602 A2	0.015767	10.3	1.43
	Qiagen	178 E	0.0513	45.9	1.95
	Qiagen	284 P	0.174967	6.3	1.79
	Qiagen	284 R	0.1683	3.8	1.89
	Qiagen	178 D	0.177633	332.8	1.83
	Qiagen	665 O	0.0062	4.5	2.39
	Qiagen	665 P	0.014567	13.5	1.99
	Qiagen	665 Q	0.034467	4.4	2.6
	Qiagen	51 B	0.066767	480.3	2.2
	Qiagen	724 A	0.006167	8.6	2.65
	CTAB	D35 A	0.0287	652.2	1.88
	CTAB	284 A (D)	0.031433	48.9	2.29
	CTAB	D35 G	0.030767	191.3	2.04
	CTAB	284 S	0.278167	63.9	1.78
	CTAB	284 K1	0.2857	13.6	1.89
	CTAB	284 E	0.1006	202.2	1.72
	CTAB	284 F	0.067967	279.7	1.8
	CTAB	284 K	0.064567	253.1	1.75
	CTAB	D35 C	0.0388	746.1	1.9
	CTAB	D35 D	0.0186	202.8	1.96
	CTAB	602 N	0.0461	294.9	1.76
Abdominal Contents
	Extraction Method	Sample #	Avg Weight (g)	DNA Concentration (ng/µl)	260/280
	PC	602 C1	0.086	545.7	1.99
	PC	602 U1	0.098	1851.5	1.97
	PC	178 B	0.029	436.5	1.9
	PC	602 Y1	0.07	2165.9	1.91
	PC	602 C	0.183	1502.7	1.84
	PC	602 D	0.383	2174.2	1.76
	PC	602 Q1	0.342	2573.5	1.77
	PC	602 B	0.43	2226.8	1.72
	PC	602 P1	0.407	2668.6	1.72
	PC	602 S1	0.344	1621.8	1.75
	PC	602 T1	0.28	3430.8	1.88
	Qiagen	178 F	0.057	7.5	1.41
	Qiagen	178 Z	0.104	-6	1.17
	Qiagen	665 L	0.012	28.3	2.19
	Qiagen	284 B	0.183	7.9	1.58
	Qiagen	665 J	0.147	11.6	2.14
	Qiagen	724 C	0.203	59.7	2.2
	Qiagen	MISC B	0.032	9.8	2.17
	Qiagen	MISC C	0.012	4.2	1.64
	Qiagen	MISC D	0.017	7.5	2.16
	Qiagen	MISC E	0.018	29.1	2.1
	Qiagen	MISC F	0.003	3.5	2.27
	CTAB	D35 A	0.0287	652.2	1.88
	CTAB	284 A (D)	0.031433	48.9	2.29
	CTAB	D35 G	0.030767	191.3	2.04
	CTAB	284 S	0.278167	63.9	1.78
	CTAB	284 K1	0.2857	13.6	1.89
	CTAB	284 E	0.1006	202.2	1.72
	CTAB	284 F	0.067967	279.7	1.8
	CTAB	284 K	0.064567	253.1	1.75
	CTAB	D35 C	0.0388	746.1	1.9
	CTAB	D35 D	0.0186	202.8	1.96
	CTAB	602 N	0.0461	294.9	1.76
